# Supplementary material
Source: HighWire-hosted journal article supplement (https://bmjopen.bmj.com/content/11/6/e033935)
Supplement: inline-supplementary-material-1 [file inline-supplementary-material-1.pdf]

## Appendix 1: Results of the Multinomial logistic model (MNL)

| Attributes                                                                                   |                                                                                                                                 | $\beta$ (SE)           |
|----------------------------------------------------------------------------------------------|---------------------------------------------------------------------------------------------------------------------------------|------------------------|
| Main effects                                                                                 | Constant                                                                                                                        | 0.9015***<br>(0.1193)  |
|                                                                                              | Effectiveness of the treatment                                                                                                  | 0.0219***<br>(0.0020)  |
|                                                                                              | Cost per tax payer per year                                                                                                     | -0.1309***<br>(0.0019) |
|                                                                                              | Treatment of Co-occurring health conditions/addictions<br>(Base level = Minimal treatment provided within program)              |                        |
|                                                                                              | Full treatment of all co-occurring health conditions/addictions both within program and<br>at referral facilities               | 0.2704***<br>(0.0558)  |
|                                                                                              | Compulsory/Voluntary Participation<br>(Base level = Compulsory)                                                                 |                        |
|                                                                                              | Voluntary                                                                                                                       | -0.4021*<br>(0.0484)   |
|                                                                                              | Flexibility of appointments<br>(Base level = Not flexible)                                                                      |                        |
|                                                                                              | Flexible                                                                                                                        | 0.1329***<br>(0.0360)  |
|                                                                                              | Location and Continuity of treatment<br>(Base level = Both prison and community with continuity of care in between transitions) |                        |
|                                                                                              | Prison only<br>(with no continuity of care post prison)                                                                         | -0.3112***<br>(0.0569) |
|                                                                                              | Community only<br>(with no continuity of care when imprisoned)                                                                  | -0.276***<br>(0.0414)  |
|                                                                                              | Prison with continuity of care post prison                                                                                      | 0.0887***<br>(0.0189)  |
|                                                                                              | Type of treatment<br>(Base level = Individual and Family counselling with medication)                                           |                        |
|                                                                                              | Offender group counselling sessions only                                                                                        | 0.0064<br>(0.0346)     |
|                                                                                              | Offender group counselling sessions with medication                                                                             | 0.0111<br>(0.0489)     |
|                                                                                              | Individual counselling with medication                                                                                          | -0.0838*<br>(0.0507)   |
|                                                                                              | Treatment providers<br>(Base level = Counsellors/Psychologists with health professionals)                                       |                        |
|                                                                                              | Health professional                                                                                                             | -0.145***<br>(0.0559)  |
|                                                                                              | Prison/Probation & parole officers with health professional                                                                     | 0.0689**<br>(0.0315)   |
| Prison/Probation & Parole officer with Counsellors/Psychologists with Health<br>Professional | 0.0227<br>(0.0315)                                                                                                              |                        |
| Goodness of fit                                                                              | Log-likelihood function                                                                                                         | -3962.92               |
|                                                                                              | Degrees of freedom                                                                                                              | 15                     |
|                                                                                              | AIC                                                                                                                             | 7955.8                 |
|                                                                                              | Number of observations                                                                                                          | 6126                   |

\*\*\* = 99% confidence level, \*\*=95% confidence level, \*=90% confidence level

## Appendix2: Results of the latent class models

| Attributes             |                                                                                                                                 | LATENT CLASS FIXED PARAMETERS |                       | LATENT CLASS RANDOM PARAMETERS |                       |  |
|------------------------|---------------------------------------------------------------------------------------------------------------------------------|-------------------------------|-----------------------|--------------------------------|-----------------------|--|
|                        |                                                                                                                                 | CLASS 1                       | CLASS 2               | CLASS 1                        | CLASS 2               |  |
| Main effects           | Constant                                                                                                                        | 0.7817***<br>(0.2079)         | 1.2484***<br>(0.2844) | 0.7913***<br>(0.2184)          | 1.2247***<br>(0.2788) |  |
|                        | Effectiveness of the treatment                                                                                                  | 0.0432***<br>(0.0038)         | -0.01167<br>(0.0053)  | 0.0436***<br>(0.0039)          | -0.0102<br>(0.0054)   |  |
|                        | Cost per tax payer per year                                                                                                     | -0.0083<br>(0.0032)           | 0.0238***<br>(0.0048) | -0.0083<br>(0.0039)            | 0.0232***<br>(0.0047) |  |
|                        | Treatment of Co-occurring health conditions/addictions<br>(Base level = Minimal treatment provided within program)              |                               |                       |                                |                       |  |
|                        | Full treatment of all co-occurring health conditions/addictions both within program and at referral facilities                  | 0.2575***<br>(0.0998)         | 0.2685**<br>(0.1154)  | 0.2385***<br>(0.1053)          | 0.2736**<br>(0.1118)  |  |
|                        | Compulsory/Voluntary Participation<br>(Base level = Compulsory)                                                                 |                               |                       |                                |                       |  |
|                        | Voluntary                                                                                                                       | -0.5294***<br>(0.1026)        | 0.3458***<br>(0.1252) | -0.4862***<br>(0.1082)         | 0.3972***<br>(0.1211) |  |
|                        | Flexibility of appointments<br>(Base level = Not flexible)                                                                      |                               |                       |                                |                       |  |
|                        | Flexible                                                                                                                        | 0.0796<br>(0.0606)            | 0.3329***<br>(0.1089) | 0.0867<br>(0.0618)             | 0.2870***<br>(0.1041) |  |
|                        | Location and Continuity of treatment<br>(Base level = Both prison and community with continuity of care in between transitions) |                               |                       |                                |                       |  |
|                        | Prison only<br>(with no continuity of care post prison)                                                                         | -0.2460***<br>(0.0919)        | 0.4155***<br>(0.1399) | -0.2482***<br>(0.0953)         | 0.3892***<br>(0.1347) |  |
|                        | Community only<br>(with no continuity of care when imprisoned)                                                                  | -0.3256***<br>(0.0706)        | 0.3271***<br>(0.1023) | -0.3337***<br>(0.0739)         | 0.3157***<br>(0.0990) |  |
|                        | Prison with continuity of care post prison                                                                                      | -0.0233<br>(0.0342)           | 0.2766***<br>(0.0589) | -0.0240<br>(0.0353)            | 0.2579***<br>(0.0556) |  |
|                        | Type of treatment<br>(Base level = Individual and Family counselling with medication)                                           |                               |                       |                                |                       |  |
|                        | Offender group counselling sessions only                                                                                        | 0.0122<br>(0.0530)            | -0.1322*<br>(0.0750)  | 0.0130<br>(0.0539)             | -0.1184<br>(0.0734)   |  |
|                        | Offender group counselling sessions with medication                                                                             | 0.0605<br>(0.0805)            | -0.0485<br>(0.1083)   | 0.0684<br>(0.0843)             | -0.0420<br>(0.1056)   |  |
|                        | Individual counselling with medication                                                                                          | 0.1147**<br>(0.0543)          | 0.0726<br>(0.1149)    | 0.1957**<br>(0.0940)           | 0.0659<br>(0.1126)    |  |
|                        | Treatment providers<br>(Base level = Counsellors/Psychologists with health professionals)                                       |                               |                       |                                |                       |  |
|                        | Health professional                                                                                                             | -0.1807***<br>(0.0657)        | -0.2165**<br>(0.0899) | -0.01721<br>(0.0675)           | 0.2092***<br>(0.0877) |  |
|                        | Prison/Probation & parole officers with health professional                                                                     | 0.1147**<br>(0.0543)          | 0.0056<br>(0.0844)    | 0.1100**<br>(0.0568)           | 0.0042<br>(0.0806)    |  |
|                        | Prison/Probation & Parole officer with Counsellors/Psychologists with Health Professional                                       | -0.0095<br>(0.0505)           | 0.1070<br>(0.0682)    | 0.0113<br>(0.0618)             | 0.0996<br>(0.0670)    |  |
|                        | Goodness of fit                                                                                                                 | Log-likelihood function       | -3723.66              |                                | -3727.92              |  |
|                        |                                                                                                                                 | Degrees of freedom            | 33                    |                                | 33                    |  |
| AIC                    |                                                                                                                                 | 7513.3                        |                       | 7529.8                         |                       |  |
| Number of observations |                                                                                                                                 | 6126                          |                       | 6126                           |                       |  |
| Demographics           | Experience with violence                                                                                                        | 0.4033**                      |                       | 0.4033**                       |                       |  |
| Class probabilities    | Class probabilities                                                                                                             | 0.6                           | 0.4                   | 0.6                            | 0.4                   |  |

\*\*\* = 99% confidence level, \*\*=95% confidence level, \*=90% confidence level

## Appendix 3: Results of the MNL and RPL models for the sub-group analysis

| Attributes                                                                                                                   | MNL MODEL ( $\beta$ (SE)) |                        |                           |                         |                        | RANDOM PARAMETERS MODEL ( $\beta$ (SE)) |                        |                           |                         |                        |
|------------------------------------------------------------------------------------------------------------------------------|---------------------------|------------------------|---------------------------|-------------------------|------------------------|-----------------------------------------|------------------------|---------------------------|-------------------------|------------------------|
|                                                                                                                              | Offenders                 | Victims                | Offenders' family members | Victims' family members | No violence experience | Offenders                               | Victims                | Offenders' family members | Victims' family members | No violence experience |
| Main effects                                                                                                                 | 1.3187<br>(0.3256)        | 1.1886***<br>(0.2802)  | 1.3702**<br>(0.5507)      | 1.1036***<br>(0.2970)   | 0.7343***<br>(0.1448)  | 1.4443<br>(0.8828)                      | 1.3533***<br>(0.3048)  | 1.4134**<br>(0.6331)      | 1.2206***<br>(0.3553)   | 0.9003***<br>(0.1879)  |
| Constant                                                                                                                     | 0.0235*<br>(0.0139)       | 0.0275***<br>(0.0045)  | 0.3078**<br>(0.0087)      | 0.0316***<br>(0.0048)   | 0.0189***<br>(0.0024)  | 0.0269<br>(0.0157)                      | 0.0307***<br>(0.0052)  | 0.0380***<br>(0.0123)     | 0.0443***<br>(0.0077)   | 0.0620***<br>(0.0096)  |
| Effectiveness of the treatment                                                                                               | -0.0156<br>(0.0125)       | -0.0170***<br>(0.0044) | -0.0216**<br>(0.0086)     | -0.0170***<br>(0.0047)  | -0.0104***<br>(0.0023) | -0.01718<br>(0.0135)                    | -0.0194***<br>(0.0047) | -0.0233**<br>(0.0098)     | -0.0194***<br>(0.0055)  | -0.0139***<br>(0.0030) |
| Cost per tax payer per year                                                                                                  |                           |                        |                           |                         |                        |                                         |                        |                           |                         |                        |
| Treatment of Co-occurring health conditions/addictions (Base level = Minimal treatment provided within program)              |                           |                        |                           |                         |                        |                                         |                        |                           |                         |                        |
| Full treatment of all co-occurring health conditions/addictions both within program and at referral facilities               | -0.0801<br>(0.3821)       | 0.3206**<br>(0.1259)   | 0.3671<br>(0.2396)        | 0.3388**<br>(0.1027)    | 0.2868***<br>(0.0687)  | -0.0591<br>(0.4229)                     | 0.3462**<br>(0.1408)   | 0.3957<br>(0.3015)        | 0.4020**<br>(0.1876)    | 0.3210***<br>(0.0994)  |
| Compulsory/Voluntary Participation (Base level = Compulsory)                                                                 |                           |                        |                           |                         |                        |                                         |                        |                           |                         |                        |
| Voluntary                                                                                                                    | -0.8433***<br>(0.3256)    | -0.6142***<br>(0.1113) | -0.6818***<br>(0.2189)    | -0.4082***<br>(0.1205)  | -0.3416***<br>(0.0587) | -0.9753**<br>(0.3928)                   | -0.6791***<br>(0.1345) | -0.7463***<br>(0.2587)    | -0.5536***<br>(0.1683)  | -0.6366***<br>(0.2197) |
| Flexibility of appointments (Base level = Not flexible)                                                                      |                           |                        |                           |                         |                        |                                         |                        |                           |                         |                        |
| Flexible                                                                                                                     | 0.3740<br>(0.2447)        | 0.0455<br>(0.0796)     | 0.1982<br>(0.1547)        | 0.2034<br>(0.0861)      | 0.1854***<br>(0.0448)  | 0.3921<br>(0.2540)                      | 0.0552<br>(0.0830)     | 0.2754<br>(0.1895)        | 0.0640<br>(0.1073)      | 0.7390***<br>(0.1931)  |
| Location and Continuity of treatment (Base level = Both prison and community with continuity of care in between transitions) |                           |                        |                           |                         |                        |                                         |                        |                           |                         |                        |
| Prison only (with no continuity of care post prison)                                                                         | -0.8005**<br>(0.3532)     | -0.3175**<br>(0.1260)  | -0.4053*<br>(0.2458)      | -0.4082***<br>(0.1387)  | -0.2994***<br>(0.0700) | -0.8844**<br>(0.3770)                   | -0.3633***<br>(0.1335) | -0.4485<br>(0.2917)       | -0.4985***<br>(0.1705)  | -0.3951***<br>(0.0909) |
| Community only (with no continuity of care when imprisoned)                                                                  | -0.5280*<br>(0.3068)      | -0.3092***<br>(0.0932) | -0.2056<br>(0.1715)       | -0.3360***<br>(0.1027)  | -2402***<br>(0.0511)   | -0.5297<br>(0.3319)                     | -0.3348***<br>(0.1023) | -0.2336<br>(0.2040)       | -0.3923***<br>(0.1306)  | -0.3503***<br>(0.0720) |
| Prison with continuity of care post prison                                                                                   | 0.2191*<br>(0.1316)       | 0.1134***<br>(0.0422)  | 0.1160<br>(0.0750)        | 0.0728<br>(0.0463)      | 0.0797***<br>(0.0235)  | 0.2515**<br>(0.1403)                    | 0.3348***<br>(0.1023)  | 0.1483<br>(0.0960)        | 0.0844<br>(0.0605)      | 0.1106***<br>(0.0330)  |
| Type of treatment (Base level = Individual and Family counselling with medication)                                           |                           |                        |                           |                         |                        |                                         |                        |                           |                         |                        |
| Offender group counselling sessions only                                                                                     | -0.1562<br>(0.2409)       | 0.0281<br>(0.0789)     | 0.1259<br>(0.1575)        | -0.1114<br>(0.0828)     | 0.0042<br>(0.0425)     | -0.1700<br>(0.2523)                     | 0.0310<br>(0.0831)     | 0.0847<br>(0.1794)        | -0.0541<br>(0.0983)     | -0.0464<br>(0.0782)    |
| Offender group counselling sessions with medication                                                                          | 0.1509<br>(0.3354)        | -0.0690<br>(0.1093)    | -0.2383<br>(0.2144)       | -0.0549<br>(0.1184)     | 0.0353<br>(0.0602)     | 0.1584<br>(0.0353)                      | -0.0665<br>(0.1152)    | -0.2257<br>(0.2477)       | -0.0549<br>(0.1430)     | 0.0660<br>(0.0782)     |
| Individual counselling with medication                                                                                       | -0.2190<br>(0.3615)       | -0.0775<br>(0.1158)    | -0.0684<br>(0.2208)       | -0.1291<br>(0.1257)     | -0.0609<br>(0.0621)    | -0.2217<br>(0.4229)                     | -0.1175<br>(0.1302)    | -0.0829<br>(0.2637)       | -0.1501<br>(0.1580)     | -0.0808<br>(0.0853)    |
| Treatment providers (Base level = Counsellors/Psychologists with health professionals)                                       |                           |                        |                           |                         |                        |                                         |                        |                           |                         |                        |
| Health professional                                                                                                          | -0.6988**<br>(0.2866)     | -0.3282***<br>(0.0901) | -0.1893<br>(0.1725)       | -0.2903***<br>(0.0970)  | -0.0603<br>(0.0488)    | -0.7787**<br>(0.3073)                   | -0.3543***<br>(0.0940) | -0.2324<br>(0.2071)       | -0.3607***<br>(0.1218)  | -0.1158<br>(0.0648)    |
| Prison/Probation & parole officers with health professional                                                                  | 0.4083*<br>(0.2263)       | 0.1105<br>(0.0693)     | -0.0868<br>(0.1291)       | 0.1452<br>(0.0764)      | 0.0594<br>(0.0381)     | 0.3987**<br>(0.2376)                    | 0.1133<br>(0.0730)     | -0.1111<br>(0.1666)       | 0.1737<br>(0.1042)      | 0.0847<br>(0.0560)     |
| Prison/Probation & Parole officer with Counsellors/Psychologists with Health Professional                                    | 0.0605<br>(0.2295)        | 0.0655<br>(0.0704)     | 0.1320<br>(0.1547)        | 0.0381<br>(0.0203)      | 0.0162<br>(0.0389)     | 0.5427<br>(0.2442)                      | 0.0591<br>(0.0753)     | 0.1597<br>(0.1534)        | 0.0488<br>(0.0890)      | 0.0390<br>(0.0493)     |
| Goodness of fit                                                                                                              |                           |                        |                           |                         |                        |                                         |                        |                           |                         |                        |
| Log likelihood function                                                                                                      | -102.01                   | -815.34                | -224.30                   | -704.58                 | -2585.18               | -100.94                                 | -807.55                | -210.71                   | -671.09                 | -2397.01               |
| Degrees of freedom                                                                                                           | 15                        | 15                     | 15                        | 15                      | 15                     | 16                                      | 16                     | 16                        | 17                      | 21                     |
| AIC                                                                                                                          | 234.0                     | 1660.7                 | 478.6                     | 1439.2                  | 5200.4                 | 233.9                                   | 1647.1                 | 453.4                     | 1376.2                  | 4836.0                 |
| Number of observations                                                                                                       | 186                       | 1302                   | 354                       | 1152                    | 3936                   | 186                                     | 1302                   | 354                       | 1152                    | 3936                   |

\*\*\* = 99% confidence level, \*\*=95% confidence level, \*=90% confidence level
